# Supplementary material
Source: HighWire-hosted journal article supplement (https://jnm.snmjournals.org/highwire/filestream/95138/field_highwire_adjunct_files/0/191932_Supplemental_Data.pdf)
Supplement: 191932_Supplemental_Data.pdf [file 191932_Supplemental_Data.pdf]

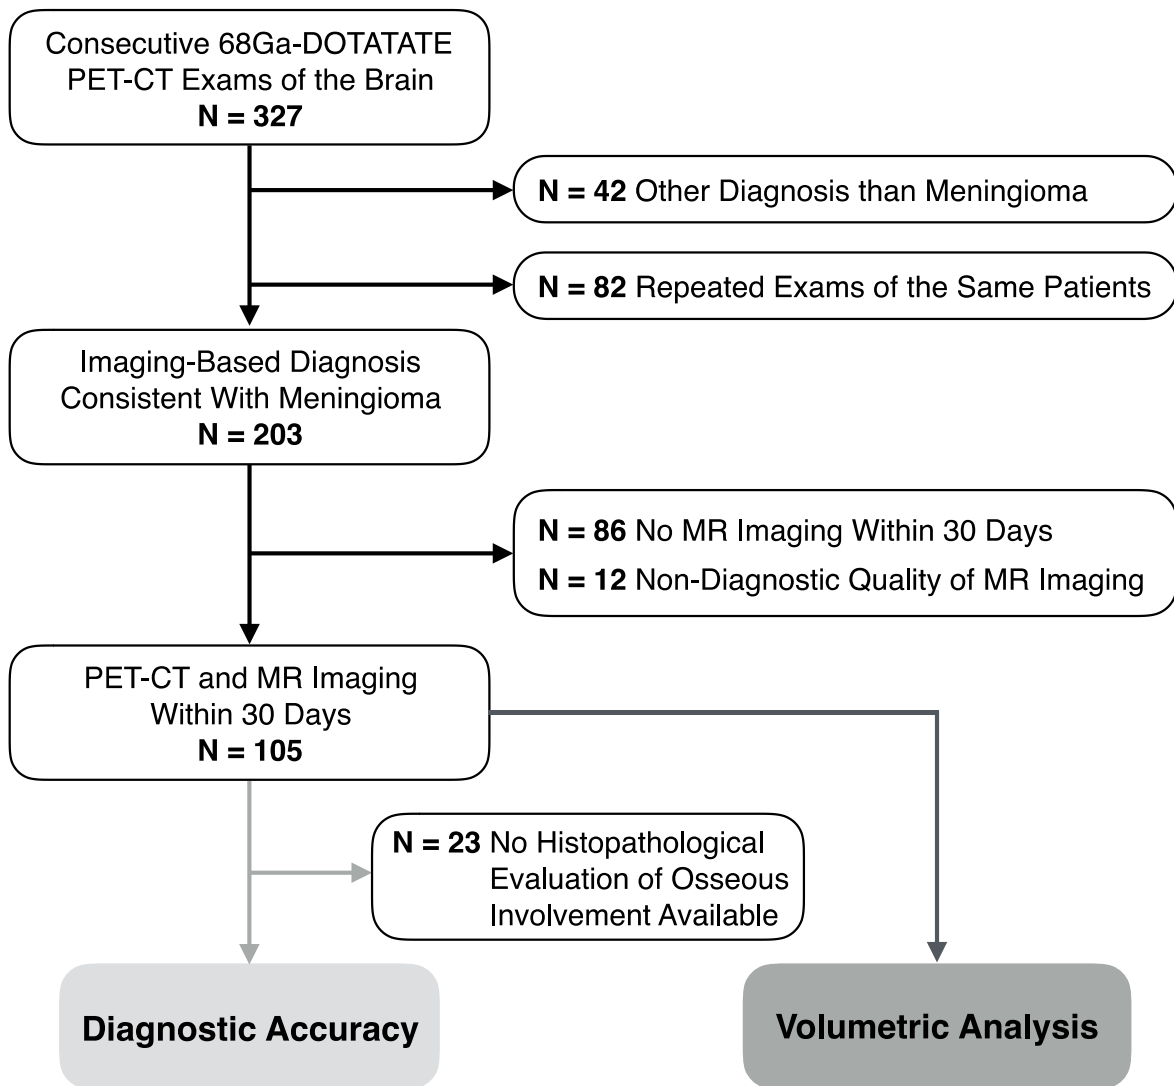

**Supplemental Figure 1.** Flow Chart of Patient Selection

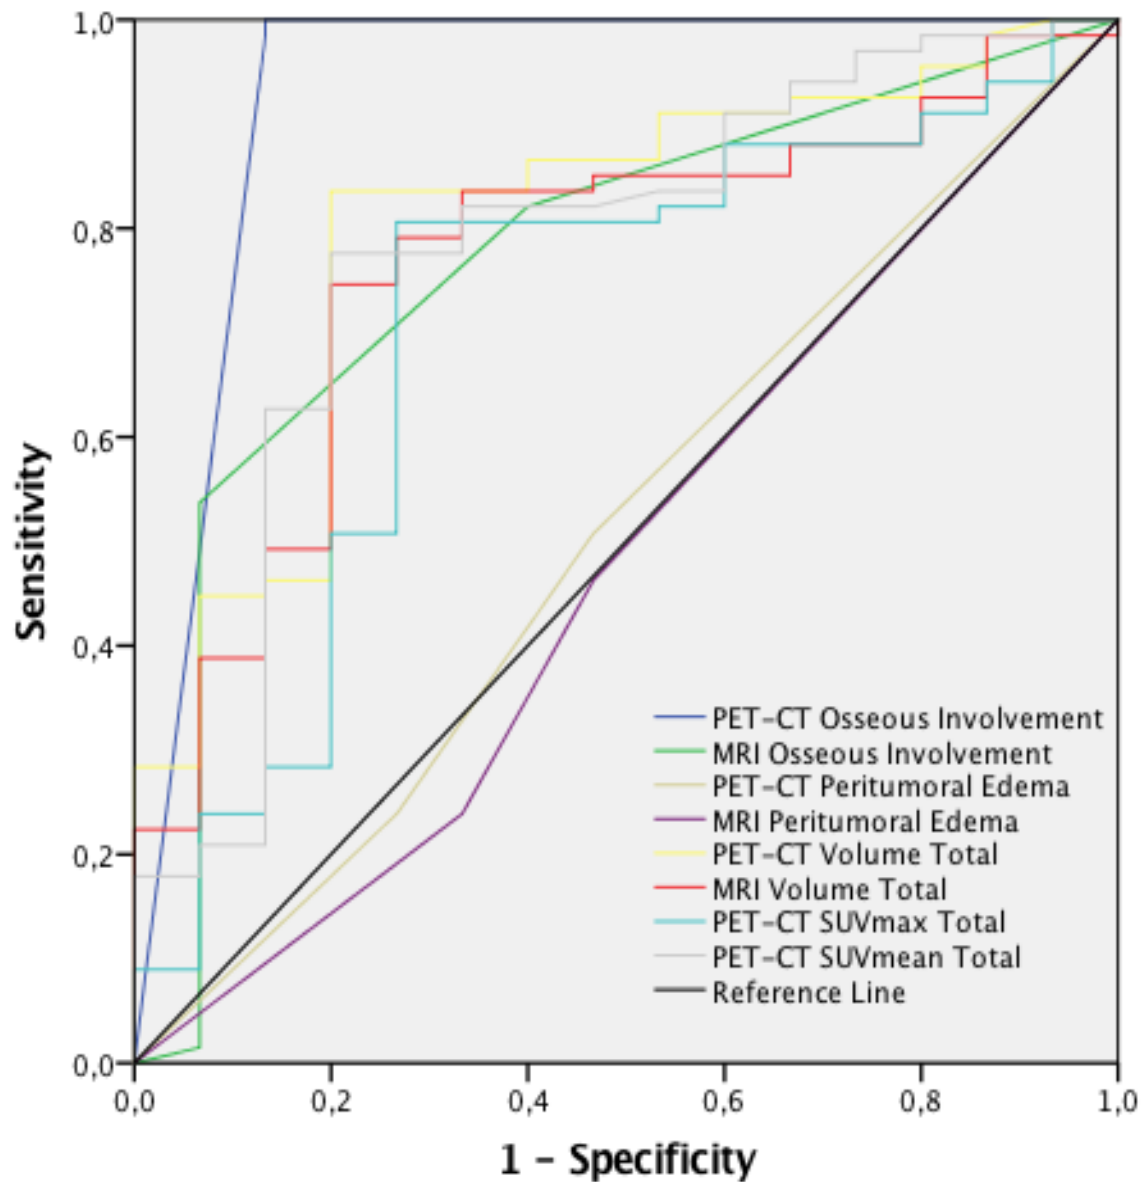

**Supplemental Figure 2.** ROC Analysis of Imaging Parameters for Osseous Involvement

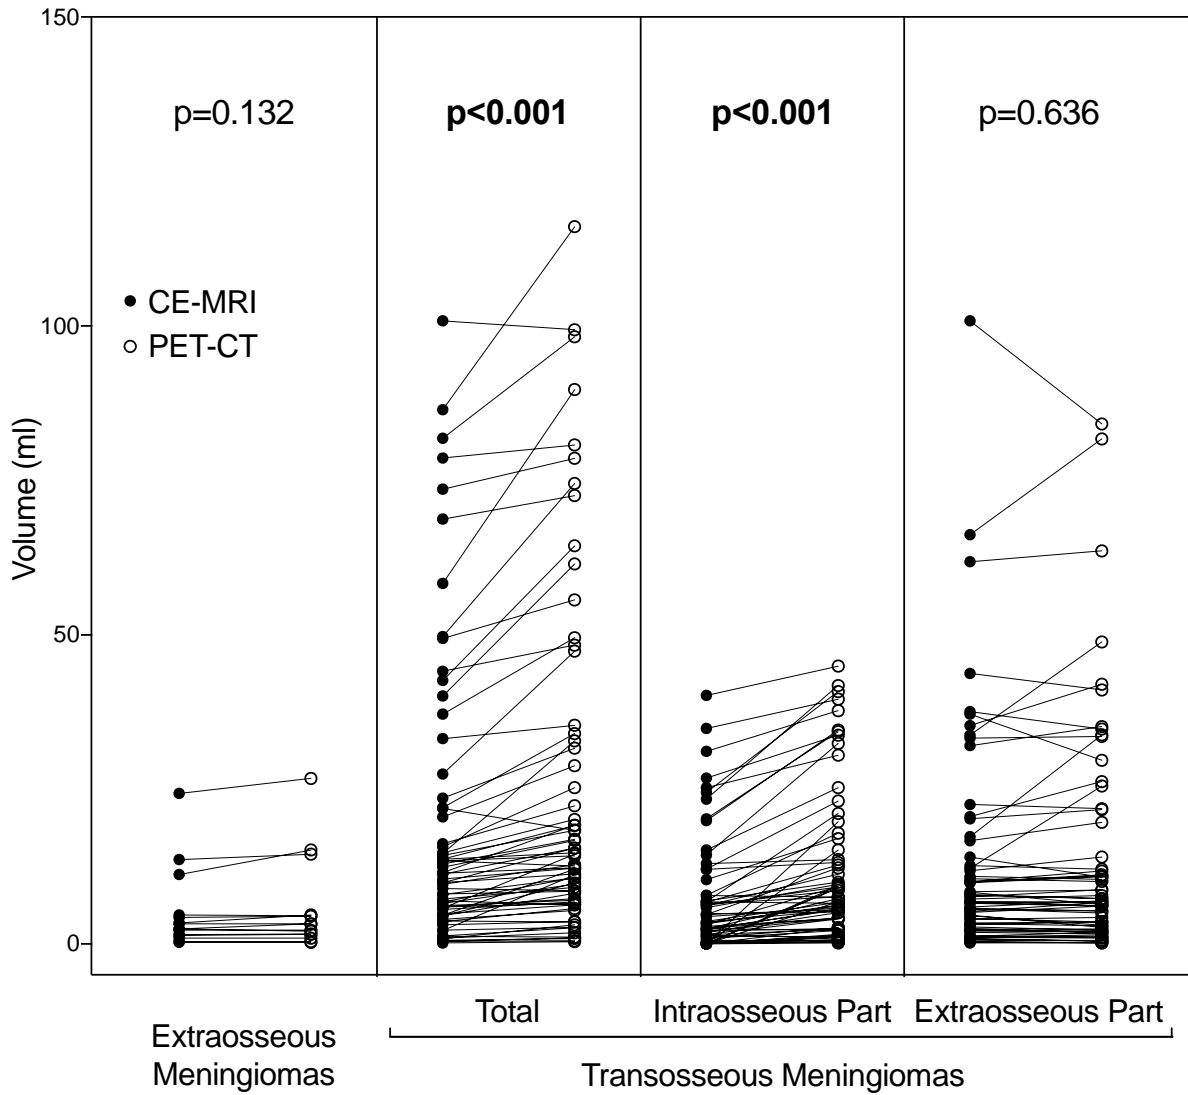

**Supplemental Figure 3.** Comparison of Estimated Volumes in  $^{68}\text{Ga}$ -DOTATATE PET-CT and CE-MRI

The plots depict the estimated volumes for extraosseous and transosseous meningiomas using  $^{68}\text{Ga}$ -DOTATATE PET-CT (open circles) and CE-MRI (full circles). The data are based on 82 meningioma patients with pathological exclusion or inclusion of osseous involvement. In case of imaging-based false-negative osseous involvement, the intraosseous part was attributed no volume (0 ml). Statistical comparison was performed using the Wilcoxon signed rank test. Bold p values indicate statistical significance.

**Supplemental Table 1.**

## Correlation Analysis of PET-CT Tracer Uptake Values and Meningioma Volume

| Meningioma Volume vs.               | PET-CT SUVmax (N=105) | PET-CT SUVmean (N=105) | PET-CT relative SUVmax (N=76) | PET-CT relative SUVmean (N=76) |
|-------------------------------------|-----------------------|------------------------|-------------------------------|--------------------------------|
| Pearson Correlation Coefficient (r) | 0.155                 | 0.188                  | 0.206                         | 0.350                          |
| p value                             | 0.114                 | 0.055                  | 0.074                         | 0.062                          |

Relative SUVmax and SUVmean values were divided by the corresponding pituitary gland tracer uptake value, which was only available in 76 patients. Bold p values indicate statistical significance.

**Supplemental Table 2. Regression Analysis for Osseous Involvement**

| Independent Parameters   | OR (95% CI) |                 | p value      |
|--------------------------|-------------|-----------------|--------------|
| Age                      | 0.934       | (0.867 - 1.006) | 0.070        |
| Sex                      | 2.577       | (0.416 - 5.950) | 0.309        |
| WHO Grade                | 0.591       | (0.138 - 2.527) | 0.478        |
| Location                 | 1.529       | (0.715 - 3.272) | 0.274        |
| PET-CT Meningioma Volume | 1.078       | (0.971 - 1.196) | 0.159        |
| PET-CT Peritumoral Edema | 1.452       | (0.513 - 4.109) | 0.482        |
| PET-CT SUVmax            | 0.854       | (0.729 - 1.001) | 0.052        |
| PET-CT SUVmean           | 2.739       | (1.011 - 7.421) | <b>0.048</b> |

A binary logistic regression analysis for pathology-assessed osseous involvement was performed. OR indicates odds ratio; CI, confidence interval; WHO, World Health Organization; SUV, standardized uptake value. Bold p values indicate statistical significance.

**Supplemental Table 3. Tumor-to-Background Signal in CE-MRI and PET-CT**

| Tumor-to-Background Signal                   | CE-MRI        | PET-CT          | p value          |
|----------------------------------------------|---------------|-----------------|------------------|
| Intraosseous Part of Transosseous Meningioma | 1.9 (1.7-2.2) | 7.5 (6.1-10.5)  | <b>&lt;0.001</b> |
| Extraosseous Part of Transosseous Meningioma | 3.7 (2.9-4.8) | 13.4 (9.2-21.8) | <b>&lt;0.001</b> |

The tumor-to-background ratio was measured in 47 patients with pathology-proven transosseous meningiomas for which CE-MRI and PET-CT diagnoses were both consistent with osseous involvement. The signal was measured for CE-MRI in contrast-enhanced T1-weighted sequences and for PET-CT as SUVmean. Bold p values indicate statistical significance.
